# Supplementary material for: Identity, migration, and social media: Generation Z in USMCA
Source: publisher site journal article supplement (doi:10.1515/omgc-2023-0042), 2023-09-01
Supplement: Supplementary file 1 [file j_omgc-2023-0042_suppl_001.docx]

**Interviewee quotes in Spanish**

1. Todo es muy generalizado, pero tengo la impresión de que (los estadounidenses) son muy arrogantes y engreídos. **E1 (MX-F-L0)**
2. Los canadienses son... muy respetuosos y amables pero distantes y fríos. **E1 (MX-F-L0)**
3. “… de Estados Unidos siento que tienen este tipo de, no sé, siento que es más tenso el ambiente entre... tú sabes, cómo se tienen estos temas de los inmigrantes y esas cosas. Pues no creo que sea como un país al cual asistir.” **E2 (MEX-M-L0)**
4. “De alguna forma somos como más independientes (los mexicanos). Nos hacen como que aprender más, ok, no solo en nuestra escuela, sino en nuestras casas (…) Pues nos enseñan a sobrevivir, en una manera, de chiquitos, de hacer nuestras cosas nosotros solos… a ellos no (a los americanos).” **E3 (MEX-F-L0)**
5. “Voy a decir ‘preocupado’, pero sería para los mexicanos. Por lo menos, siempre como esta sensación de que somos justicieros sociales; no creo que sea lo mejor, pero por lo menos muestras interés.” **E5 (MEX-F-M1)**
6. “Para los estadounidenses, eso también aplica para los adolescentes, diría manipulables, porque hasta donde yo he escuchado, los medios en Estados Unidos sí traen a todo el mundo muy muy controlado. Entonces serían como manipulables, polémicos. Pero también interesados, o sea, sí siento que las personas de Estados Unidos son mucho así” **E9 (MEX-F-M2)**
7. “Yo he visto que son muy liberales (los canadienses), entonces son gente que, como muy tranquila (...) Es más como tranquilo el ambiente en el que vive (...) sigo a una famosa o dos y una banda de música de Estados Unidos y de Canadá, también (...) a través de Instagram, TikTok, y Snapchat.” **E8 (MEX-M-M1)**
8. “Algo que nosotros como mexicanos consideramos como cultura general, ellos no tienen ni idea (…) No es ignorancia, pero tampoco están muy informados”. **E13 (MEX-F-M3)**
9. “Los jóvenes de Estados Unidos somos deportistas, pero un poco independientes, nos gusta la tecnología, los videojuegos (yo juego mucho en línea con chinos) (…) los canadienses, no sé bien no los conozco, pero pienso que son amistosos y buenas personas.  Y los mexicanos muy alegres y chistosos, son amigables”. **E46 (USA-M-M3)**
